# Supplementary material for: Genome-wide comparative analysis of H3K4me3 profiles between diploid and allotetraploid cotton to refine genome annotation
Source: PubMed Central journal article supplement (PMC5567255; doi:10.1038/s41598-017-09680-6), 2017-08-22
Supplement: 41598_2017_9680_MOESM1_ESM.pdf [file 41598_2017_9680_MOESM1_ESM.pdf]

## **Genome-wide comparative analysis of H3K4me3 profiles between diploid and allotetraploid cotton to refine genome annotation**

Qi You<sup>†1</sup>, Xin Yi<sup>†1</sup>, Kang Zhang<sup>†1</sup>, Chunchao Wang<sup>1</sup>, Xuelian Ma<sup>1</sup>, Xueyan Zhang<sup>2</sup>, Wenying Xu<sup>1</sup>, Fuguang Li<sup>\*2</sup>, Zhen Su<sup>\*1</sup>

<sup>1</sup>State key Laboratory of Plant Physiology and Biochemistry, College of Biological Sciences, China Agricultural University, Beijing, 100193, China

<sup>2</sup>State Key Laboratory of Cotton Biology, Institute of Cotton Research, Chinese Academy of Agriculture Sciences (CAAS), Anyang, Henan 455000, China

† These authors contributed equally to this work

\* Authors for correspondence

Zhen Su

e-mail: zhensu@cau.edu.cn; fax: +86-10-62731380

Fuguang Li

e-mail: aylifug@hotmail.com; fax: +86-372-2562256

Supplementary figures and tables

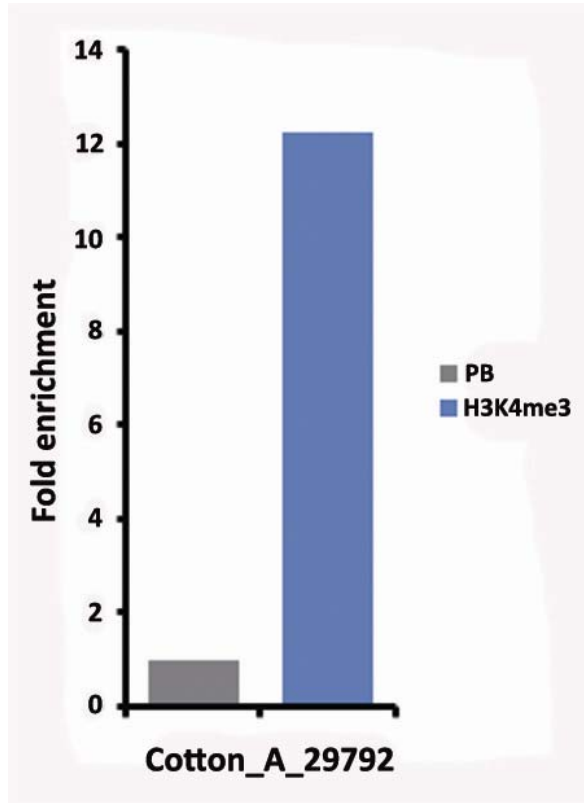

**Fig. S1. Results of CHIP-qPCR validation.**

Primers are designed using the sequence of the annotated *G. arboreum* gene Cotton\_A\_29792 (EUKARYOTIC ELONGATION FACTOR 5A-1) which has an enriched H3K4me3 peak.

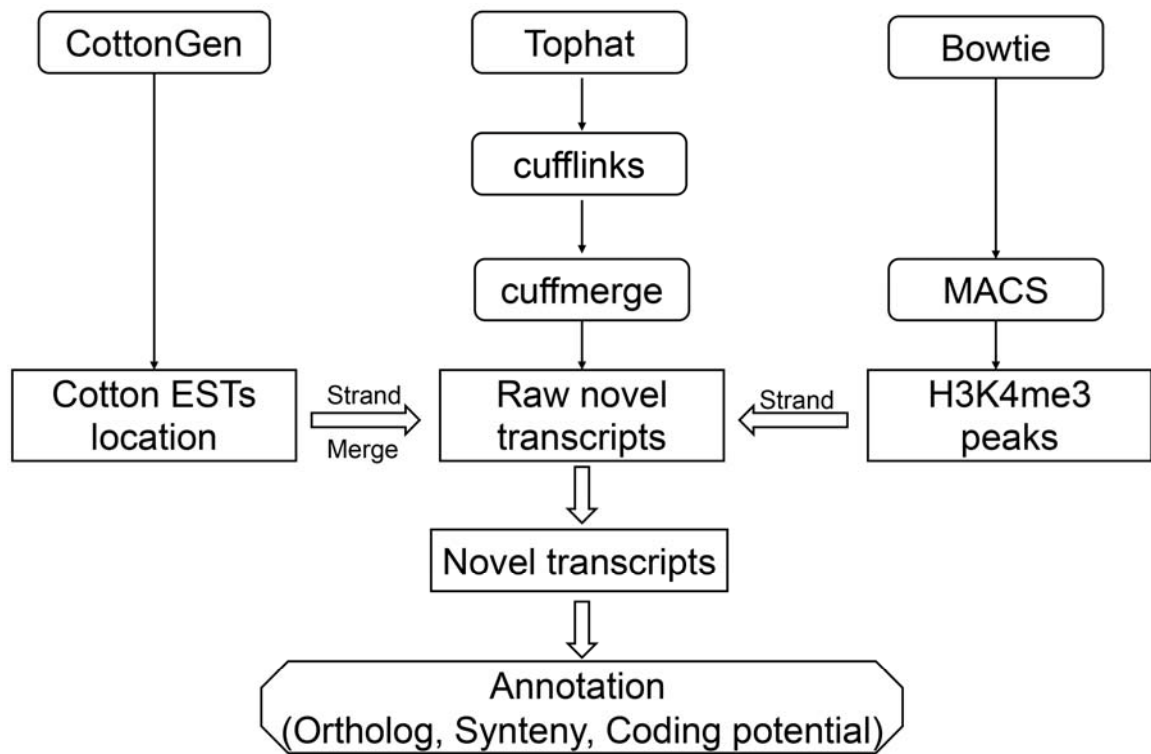

**Fig. S2. Protocol for novel transcript identification.**

An integrative method for epigenomics profiling and new transcript identification of diploid cotton *G. arboreum* and polyploid cotton *G. hirsutum*. The details are described in the methods section.

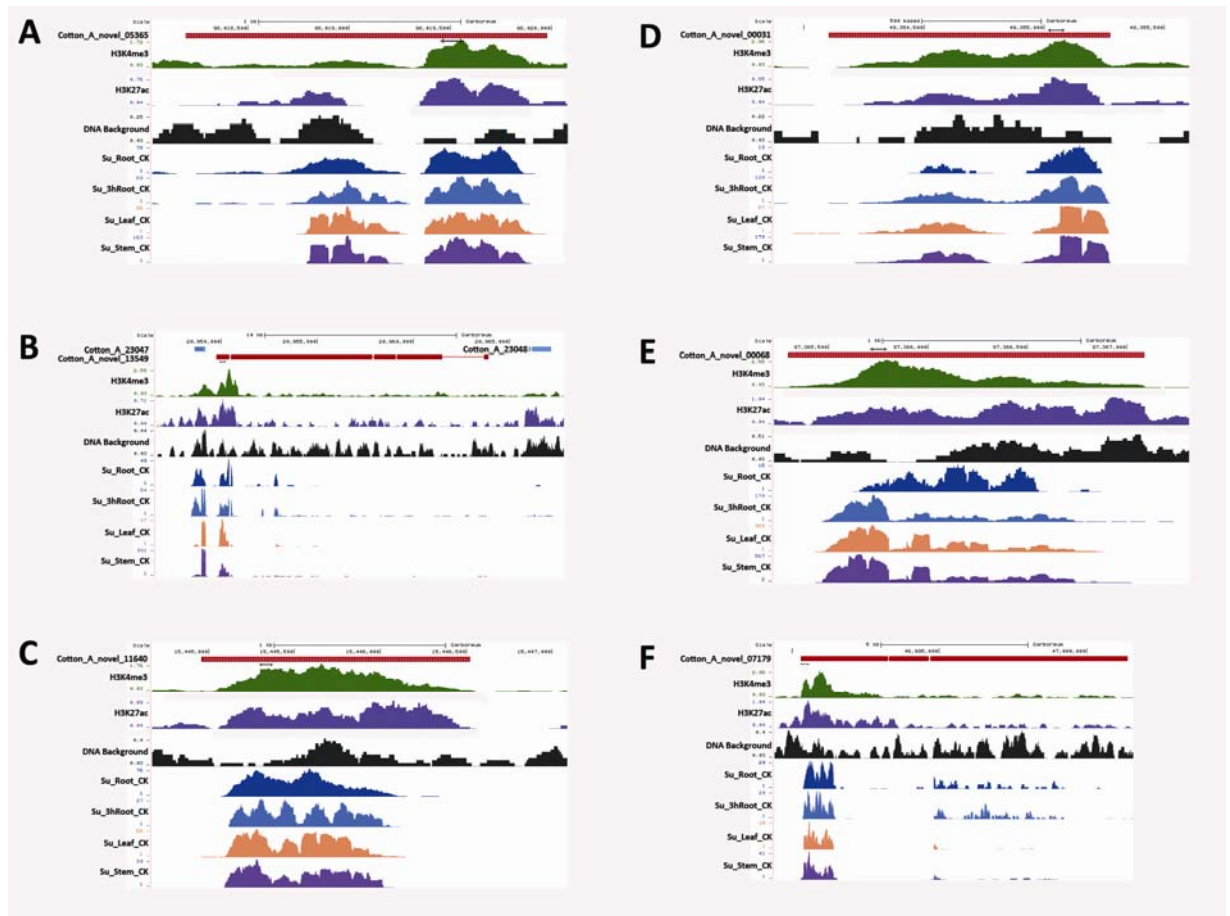

**Fig. S3. Profiles of six selected transcripts.**

Six screen-shots of the UCSC Genome Browser showing the epigenomic maps of six novel genes were selected from the newly identified transcripts. The first track shows the 5' and 3' primer sequences we used in the RT-PCR experiments. The second track shows the new transcript locations. The third track is the H3K4me3 histone modification situation in wig format. The last four tracks show the RNA-seq expression level with our own in-house data. **(A)** The UCSC Genome Browser screen-shot of Cotton\_A\_novel\_05365. **(B)** The UCSC Genome Browser screen-shot of Cotton\_A\_novel\_13549. **(C)** The UCSC Genome Browser screen-shot of Cotton\_A\_novel\_11640. **(D)** The UCSC Genome Browser screen-shot of Cotton\_A\_novel\_00031. **(E)** The UCSC Genome Browser screen-shot of Cotton\_A\_novel\_00068. **(F)** The UCSC Genome Browser screen-shot of Cotton\_A\_novel\_07179.

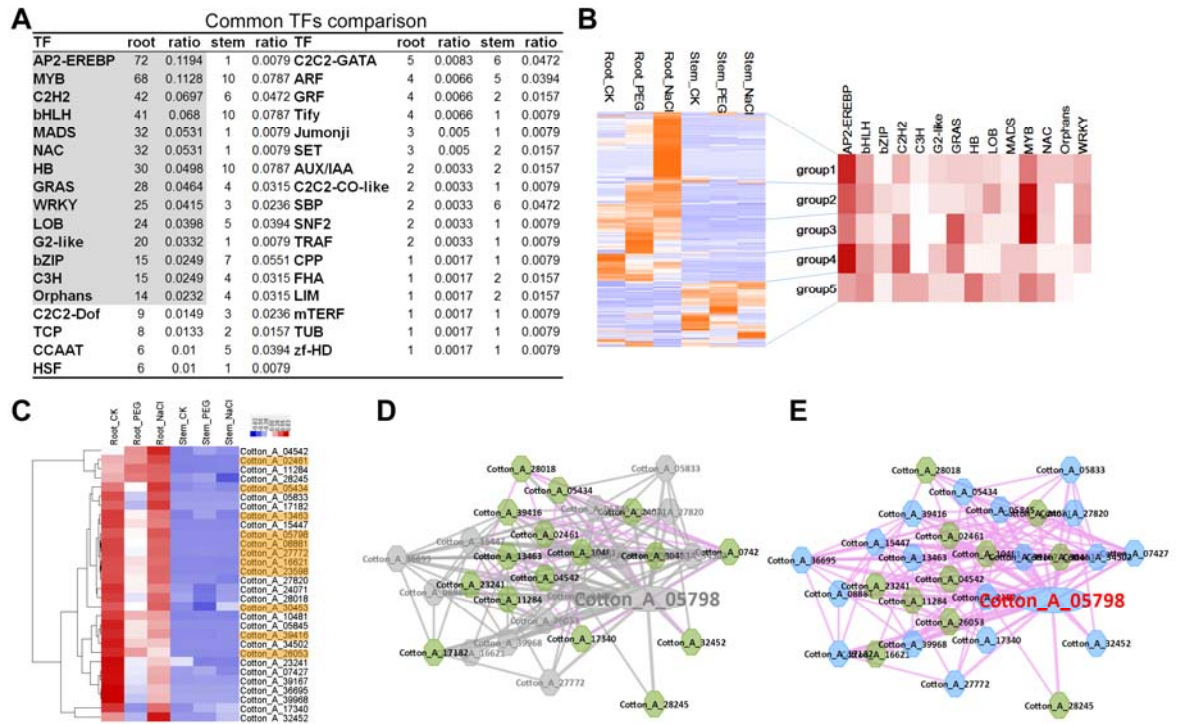

**Fig. S4. Modularized comparison of differential histone modification between tissues.**

(A) The table displays 603 TFs with root-up modification and 127 TFs with stem-up modification. The columns, titled 'root' or 'stem' summarize the total members in the corresponding TF families. The ratio column shows the distribution of each TF family (e.g.,  $0.1194 = 72/603$ ). (B) The left heatmap shows the TFs highlighted in (A) clustered into 5 groups based on their expression profiles. The right heatmap exhibits the distribution of TF families in each group. Specifically, AP2 family members appear most and bZIP family members appear least in group1. (C) A clustered expression heatmap of 30 genes in the positive co-expression network of Cotton\_A\_05798. A total of 11 genes highlighted in orange have root-up H3K4me3 modification. (D-E) The expression view result of 30 genes in the positive co-expression network of Cotton\_A\_05798. A pink line links positive co-expression gene pairs. Grey and green nodes are unexpressed and expressed genes in stem tissue (D). Blue nodes are genes that were down-regulated in root tissue after PEG treatment (E).

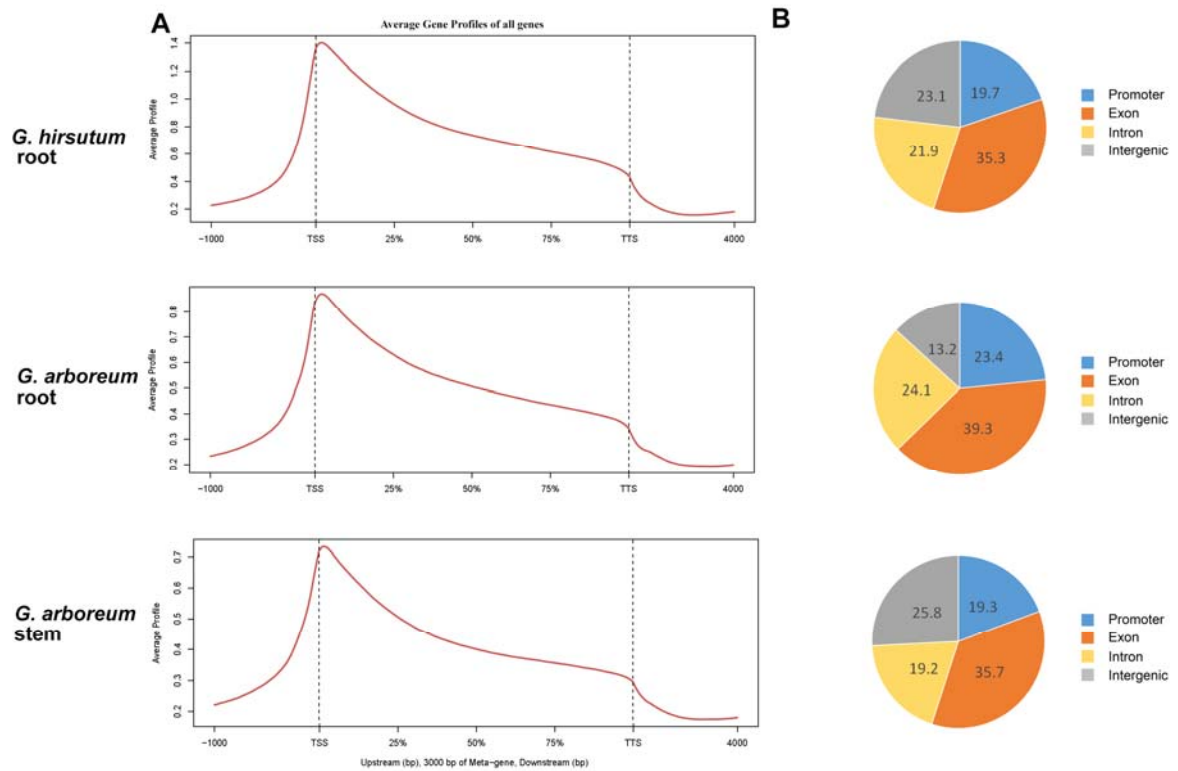

**Fig. S5. H3K4me3 distribution in the newest genome annotation.**

(A) The average novel and known gene profiles of H3K4me3 in cotton root and stem were generated from CEAS software using normalized sequencing read density. The gene body was divided into three equal parts to standardize different gene lengths, and the 1 kb upstream and 4 kb downstream region were also included for profile generation. (B) The distribution of H3K4me3 histone modification within 4 main gene regions of known and novel genes in root and stem tissues of *G. arboreum* and root tissue of *G. hirsutum*.

**Table S1.** Detailed information of RNA-seq data of cotton.

| <b>Samples</b>                                                   | <b>Reference</b>                            |
|------------------------------------------------------------------|---------------------------------------------|
| <b>Detailed information of RNA-seq data of <i>G.arboreum</i></b> |                                             |
| Su_Stem_CK(Pair-end)                                             |                                             |
| Su_Root_CK(Pair-end)                                             |                                             |
| Su_Leaf_CK(Pair-end)                                             | Xueyan Zhang et al. 2013                    |
| Su_3hRoot_CK(Pair-end)                                           |                                             |
| Pub_Fiber_10dpa(Single-end)                                      |                                             |
| Pub_Fiber_20dpa(Single-end)                                      | Cotton Functional Genomics project,<br>2004 |
| Pub_Leaf_CK(Single-end)                                          | M-J Yoo et al. 2013                         |
| Pub_Seeds_10dpa(Single-end)                                      |                                             |
| Pub_Seeds_20dpa(Single-end)                                      |                                             |
| Pub_Seeds_30dpa(Single-end)                                      | Simon Renny-Byfield et al. 2014             |
| Pub_Seeds_40dpa(Single-end)                                      |                                             |
| Pub_Seedling_5h(Single-end)                                      |                                             |
| Pub_Seedling_15h(Single-end)                                     | Tao Tao et al. 2013                         |
| Pub_Seedling_30h(Single-end)                                     |                                             |
| <b>Detailed information of RNA-seq data of <i>G.hirsutum</i></b> |                                             |
| calycle_1(single_end)                                            |                                             |
| calycle_2(single_end)                                            | SRR1695180                                  |
| cotyledon_120h_1(single_end)                                     |                                             |
| cotyledon_120h_2(single_end)                                     | SRR1695167                                  |
| fiber_25dpa_1(single_end)                                        |                                             |
| fiber_25dpa_2(single_end)                                        | SRR1695194                                  |
| leaf_1(single_end)                                               |                                             |
| leaf_2(single_end)                                               | SRR1695175                                  |
| ovule_35dpa_1(single_end)                                        |                                             |
| ovule_35dpa_2(single_end)                                        | SRR1695190                                  |

|                        |            |
|------------------------|------------|
| petal_1(single_end)    | SRR1695177 |
| petal_2(single_end)    |            |
| pistil_1(single_end)   | SRR1695179 |
| pistil_2(single_end)   |            |
| root_1(single_end)     | SRR1695173 |
| root_2(single_end)     |            |
| seed_10h_1(single_end) | SRR1695162 |
| seed_10h_2(single_end) |            |
| stamen_1(single_end)   | SRR1695178 |
| stamen_2(single_end)   |            |
| stem_1(single_end)     | SRR1695174 |
| stem_2(single_end)     |            |
| torus_1(single_end)    | SRR1695176 |
| torus_2(single_end)    |            |



**Table S2.** A list of PCR primer used in this study.

| <b>Target</b>        | <b>Forward</b>       | <b>Reverse</b>       |
|----------------------|----------------------|----------------------|
| 25S rRNA             | CAGTACGAATACGAACCGTG | CAATGATAGGAAGAGCCGAC |
| Cotton_A_novel_05365 | GGCATGAACAGTGGTGATTG | ATCCCTTCTCCGTTGCTTT  |
| Cotton_A_novel_13549 | TCAAACCCACTGACCATTCA | GGTGGATGCTGATCGAAGAT |
| Cotton_A_novel_11640 | CCTTCTCTGCAACTCGCTTC | GAGGCGCTATGTCTCCTTTG |
| Cotton_A_novel_00031 | ACACGACGGGTTTCAAAGAA | CCATTTTCGAGCTCTCTTGG |
| Cotton_A_novel_00068 | CAACCCAAAACCCAGAGTGT | TACCTCTTTGTTCCCCGTTG |
| Cotton_A_novel_07179 | GCCAGAGTAGGCTCATCACC | ATCTTGCTCAGCGGTGCTAT |
| Cotton_A_29792       | AGACACCACTTTGAAACCCG | CTGCTGAGGGTAGGTTTTGG |

**Table S3.** Annotation table of all newly identified transcripts of cotton.  
(in additional excel file)

**Table S4.** Annotation table of all retrieved lost genes.  
(in additional excel file)

**Table S5.** GTF format of novel transcripts in *G. arboreum*.  
(in additional gff file)

**Table S6.** GTF format of novel transcripts in *G. hirsutum*.  
(in additional gff file)
